# Supplementary material
Source: Royal Society of Chemistry journal article supplement (doi:10.1039/d6ay00534a)
Supplement: d6ay00534a1.pdf [file d6ay00534a1.pdf]

## Supplementary Information

# Zirconium-Based Metal–Organic Framework (UiO-66) Anchored on Magnetic Graphene Oxide as a Superior Sorbent for the Determination of Polycyclic Aromatic Hydrocarbons in Water Samples

Maryam Asefi<sup>a</sup>, Mahtab Eraghi<sup>b</sup>, Amirhassan Amiri\*<sup>a</sup>, Mehdi Baghayeri<sup>b</sup>

<sup>a</sup> Department of Chemistry, Faculty of Science, Ferdowsi University of Mashhad, 9177948974,  
Mashhad, Iran

<sup>b</sup> Department of Chemistry, Faculty of Science, Hakim Sabzevari University, PO. Box 397,  
Sabzevar, Iran

\*E-mail address: [ah.amiri@um.ac.ir](mailto:ah.amiri@um.ac.ir)

**Table S1.** Univariate optimization procedure: summary of parameters optimized, ranges tested, optimal values selected, and constant conditions maintained during each optimization step.

| <b>Optimized Parameter</b>            | <b>Range Tested</b>                        | <b>Optimal Value</b> | <b>Parameters Kept Constant During Evaluation</b>                                                                                                                           |
|---------------------------------------|--------------------------------------------|----------------------|-----------------------------------------------------------------------------------------------------------------------------------------------------------------------------|
| <b>Desorption solvent type</b>        | Toluene, dichloromethane, hexane, methanol | Dichloromethane      | Sorbent amount (10 mg), desorption solvent volume (1 mL), extraction time (3 min), desorption time (3 min), ionic strength (NaCl 0%), sample volume (20 mL).                |
| <b>Sorbent amount (mg)</b>            | 5 – 25                                     | 15                   | Desorption solvent (dichloromethane), desorption solvent volume (1 mL), extraction time (3 min), desorption time (3 min), ionic strength (NaCl 0%), sample volume (20 mL).  |
| <b>Desorption solvent volume (mL)</b> | 0.5 – 1.5                                  | 1.0                  | Desorption solvent (dichloromethane), sorbent amount (15 mg), extraction time (3 min), desorption time (3 min), ionic strength (NaCl 0%), sample volume (20 mL).            |
| <b>Extraction time (min)</b>          | 1 – 4                                      | 2                    | Desorption solvent (dichloromethane), sorbent amount (15 mg), desorption solvent volume (1.0 mL), desorption time (3 min), ionic strength (NaCl 0%), sample volume (20 mL). |
| <b>Desorption time (min)</b>          | 1 – 4                                      | 2                    | Desorption solvent (dichloromethane), sorbent amount (15 mg), desorption solvent volume (1.0 mL), extraction time (2 min), ionic strength (NaCl 0%), sample volume (20 mL). |
| <b>Ionic strength (NaCl %, w/v)</b>   | 0 – 20                                     | 10                   | Desorption solvent (dichloromethane), sorbent amount (15 mg), desorption solvent volume (1.0 mL), extraction time (2 min), desorption time (2 min), sample volume (20 mL).  |

**Table S2.** Input data used for the AGREEprep greenness assessment.

| <b>AGREEprep Criterion</b>                           | <b>Input Parameter / Selection</b>   | <b>Value / Description</b>                 |
|------------------------------------------------------|--------------------------------------|--------------------------------------------|
| <b>Sample preparation placement</b>                  | Location of sample preparation       | Ex-situ                                    |
| <b>Hazardous materials</b>                           | Total amount of hazardous substances | 1 mL (DCM)                                 |
| <b>Sustainability, renewability, and reusability</b> | Origin of materials                  | Materials are not sustainable or renewable |
| <b>Waste generation</b>                              | Total waste volume                   | 1.5 mL                                     |
| <b>Sample size economy</b>                           | Sample volume                        | 1 mL                                       |
| <b>Sample throughput</b>                             | Number of samples prepared per hour  | 10 samples h <sup>-1</sup>                 |
| <b>Integration and automation (steps)</b>            | Number of steps in procedure         | 3 steps                                    |
| <b>Integration and automation (automation level)</b> | Degree of automation                 | Manual system                              |
| <b>Energy consumption</b>                            | Energy per sample                    | 4 Wh per sample                            |
| <b>Post-sample preparation configuration</b>         | Instrumentation type                 | GC with non-MS detection                   |
| <b>Operator safety</b>                               | Number of hazards                    | 1 hazard                                   |

**Table S3.** Evaluation criteria used for the BAGI greenness assessment.

| <b>BAGI Criterion</b>                  | <b>Input Parameter</b>       | <b>Value / Description</b>                            |
|----------------------------------------|------------------------------|-------------------------------------------------------|
| <b>Type of analysis</b>                | Analytical purpose           | Quantitative                                          |
| <b>Multi-/single-element analysis</b>  | Number of analytes           | Multi-element analysis (2–5 compounds)                |
| <b>Analytical technique</b>            | Instrumentation level        | Simple instrumentation available in most laboratories |
| <b>Simultaneous sample preparation</b> | Parallel processing capacity | 2–12 samples                                          |
| <b>Sample preparation</b>              | Procedure type               | Miniaturized extraction sample preparation            |
| <b>Sample throughput</b>               | Samples per hour             | 2-4 samples h <sup>-1</sup>                           |
| <b>Reagents and materials</b>          | Availability                 | Common commercially available reagents                |
| <b>Preconcentration</b>                | Requirement                  | Preconcentration required (single-step enrichment)    |
| <b>Degree of automation</b>            | Operational mode             | Manual treatment and analysis                         |
| <b>Amount of sample</b>                | Sample volume                | 10-50 mL for environmental samples                    |
